# Supplementary material for: Combined health risks of cigarette smoking and low levels of physical activity: a prospective cohort study in England with 12-year follow-up
Source: PubMed Central journal article supplement (PMC6887020; doi:10.1136/bmjopen-2019-032852), 2019-11-27
Supplement: bmjopen-2019-032852supp002.pdf [file bmjopen-2019-032852supp002.pdf]

## Supplementary tables

**Supplementary Table 1.** Baseline characteristics of participants included in the analysed sample compared with those who were excluded

|                                                                       | Excluded<br>(n=3007) | Included<br>(n=6425) | <i>p</i> |
|-----------------------------------------------------------------------|----------------------|----------------------|----------|
| Age in years, mean (SD)                                               | 65.60 (13.28)        | 65.88 (9.34)         | 0.229    |
| Sex, % ( <i>n</i> )                                                   |                      |                      |          |
| Men                                                                   | 40.7 (1223)          | 45.2 (2902)          | <0.001   |
| Women                                                                 | 59.3 (1784)          | 54.8 (3523)          | -        |
| Ethnicity, % ( <i>n</i> )                                             |                      |                      |          |
| White                                                                 | 95.0 (2847)          | 98.8 (6345)          | <0.001   |
| Non-white                                                             | 5.0 (149)            | 1.2 (80)             | -        |
| Wealth quintile, % ( <i>n</i> )                                       |                      |                      |          |
| 1 (poorest)                                                           | 28.8 (643)           | 14.6 (940)           | <0.001   |
| 2                                                                     | 24.0 (536)           | 18.5 (1188)          | -        |
| 3                                                                     | 18.0 (403)           | 20.8 (1338)          | -        |
| 4                                                                     | 15.3 (341)           | 22.3 (1432)          | -        |
| 5 (richest)                                                           | 14.0 (313)           | 23.8 (1527)          | -        |
| Alcohol intake, % ( <i>n</i> )                                        |                      |                      |          |
| Never/rarely                                                          | 23.6 (406)           | 18.9 (1213)          | <0.001   |
| Regularly                                                             | 42.4 (728)           | 45.3 (2909)          | -        |
| Frequently                                                            | 34.0 (585)           | 35.8 (2303)          | -        |
| BMI, mean (SD)                                                        | 17.72 (14.48)        | 27.91 (4.87)         | <0.001   |
| Fair/poor self-rated health <sup>1</sup> , % ( <i>n</i> )             | 35.1 (1008)          | 24.5 (1575)          | <0.001   |
| Limiting long-standing illness <sup>1</sup> , % ( <i>n</i> )          | 40.9 (1230)          | 32.9 (2111)          | <0.001   |
| Coronary heart disease <sup>1</sup> , % ( <i>n</i> )                  | 9.9 (299)            | 8.6 (553)            | 0.035    |
| Stroke <sup>1</sup> , % ( <i>n</i> )                                  | 5.1 (153)            | 2.4 (152)            | <0.001   |
| Cancer <sup>1</sup> , % ( <i>n</i> )                                  | 6.9 (208)            | 7.7 (496)            | 0.167    |
| Chronic lung disease <sup>1</sup> , % ( <i>n</i> )                    | 7.4 (223)            | 7.3 (466)            | 0.777    |
| Clinically relevant depressive symptoms <sup>1</sup> , % ( <i>n</i> ) | 20.3 (565)           | 13.5 (860)           | <0.001   |
| Smoking status, % ( <i>n</i> )                                        |                      |                      |          |
| Never smoker                                                          | 36.1 (1085)          | 37.2 (2387)          | <0.001   |
| Former smoker                                                         | 44.6 (1341)          | 48.9 (3141)          | -        |
| Current smoker                                                        | 19.2 (578)           | 14.0 (897)           | -        |
| Level of physical activity, % ( <i>n</i> )                            |                      |                      |          |
| High                                                                  | 53.5 (1536)          | 65.9 (4233)          | <0.001   |
| Low                                                                   | 46.5 (1336)          | 34.1 (2192)          | -        |

BMI = body mass index; SD = standard deviation. Note: due to missing data, numbers do not sum to the total and percentages do not sum to 100 for the group of excluded participants for some variables.

**Supplementary Table 2.** Bayes factors for multiplicative interactions between smoking status and physical activity

|                                         | Large effects (RR=3) |                          | Medium effects (RR=2) |                        | Small effects (RR=1.5) |                          |
|-----------------------------------------|----------------------|--------------------------|-----------------------|------------------------|------------------------|--------------------------|
|                                         | BF                   | Interpretation           | BF                    | Interpretation         | BF                     | Interpretation           |
| Fair/poor self-rated health             | 0.23                 | Moderate evidence for H0 | 0.36                  | Data were insensitive  | 0.56                   | Data were insensitive    |
| Limiting long-standing illness          | 0.28                 | Moderate evidence for H0 | 0.43                  | Data were insensitive  | 0.65                   | Data were insensitive    |
| Coronary heart disease                  | 0.48                 | Data were insensitive    | 0.68                  | Data were insensitive  | 0.88                   | Data were insensitive    |
| Stroke                                  | 0.62                 | Data were insensitive    | 0.84                  | Data were insensitive  | 1.02                   | Data were insensitive    |
| Cancer                                  | 0.30                 | Moderate evidence for H0 | 0.45                  | Data were insensitive  | 0.65                   | Data were insensitive    |
| Chronic lung disease                    | 0.04                 | Strong evidence for H0   | 0.06                  | Strong evidence for H0 | 0.11                   | Moderate evidence for H0 |
| Clinically relevant depressive symptoms | 0.29                 | Moderate evidence for H0 | 0.43                  | Data were insensitive  | 0.65                   | Data were insensitive    |

BF=Bayes factor, H0=null hypothesis, RR=relative risk.

**Supplementary Table 3.** Main effects of smoking status and physical activity and the interaction between smoking status and physical activity for risks of incident health problems over 12-year follow-up: imputed outcome data for participants who dropped out before Wave 8

|                                       | Smoking status |                  |                  | Physical activity |                  | Interaction <sup>1</sup>      |                                |
|---------------------------------------|----------------|------------------|------------------|-------------------|------------------|-------------------------------|--------------------------------|
|                                       | Never smoker   | Former smoker    | Current smoker   | High active       | Low active       | Former smoker<br>x low active | Current smoker<br>x low active |
| <b>Fair/poor self-rated health</b>    |                |                  |                  |                   |                  |                               |                                |
| % (n)                                 | 48.9 (1168)    | 58.5 (1839)      | 69.7 (625)       | 48.9 (2071)       | 71.2 (1562)      | -                             | -                              |
| RR [95% CI]                           | 1              | 1.20 [1.09-1.32] | 1.42 [1.25-1.63] | 1                 | 1.46 [1.33-1.60] | -                             | -                              |
| <i>p</i>                              |                | <0.001           | <0.001           |                   | <0.001           |                               |                                |
| RR <sub>adj</sub> [95% CI]            | 1              | 1.15 [1.02-1.30] | 1.52 [1.27-1.81] | 1                 | 1.23 [1.05-1.44] | 0.95 [0.78-1.15]              | 0.97 [0.74-1.27]               |
| <i>p</i>                              |                | 0.023            | <0.001           |                   | 0.012            | 0.567                         | 0.810                          |
| <b>Limiting long-standing illness</b> |                |                  |                  |                   |                  |                               |                                |
| % (n)                                 | 62.8 (1499)    | 69.8 (2192)      | 72.9 (654)       | 62.1 (2630)       | 78.2 (1715)      | -                             | -                              |
| RR [95% CI]                           | 1              | 1.11 [1.01-1.22] | 1.16 [1.03-1.31] | 1                 | 1.26 [1.16-1.37] | -                             | -                              |
| <i>p</i>                              |                | 0.025            | 0.019            |                   | <0.001           |                               |                                |
| RR <sub>adj</sub> [95% CI]            | 1              | 1.08 [0.96-1.21] | 1.18 [1.00-1.39] | 1                 | 1.11 [0.96-1.28] | 0.98 [0.82-1.17]              | 1.06 [0.82-1.37]               |
| <i>p</i>                              |                | 0.195            | 0.053            |                   | 0.166            | 0.786                         | 0.666                          |
| <b>Coronary heart disease</b>         |                |                  |                  |                   |                  |                               |                                |
| % (n)                                 | 14.1 (335)     | 20.3 (639)       | 25.3 (227)       | 14.0 (594)        | 27.7 (607)       | -                             | -                              |
| RR [95% CI]                           | 1              | 1.45 [1.20-1.75] | 1.79 [1.32-2.44] | 1                 | 1.97 [1.71-2.27] | -                             | -                              |
| <i>p</i>                              |                | <0.001           | 0.001            |                   | <0.001           |                               |                                |
| RR <sub>adj</sub> [95% CI]            | 1              | 1.21 [0.96-1.53] | 2.05 [1.43-2.94] | 1                 | 1.37 [1.02-1.82] | 1.04 [0.71-1.54]              | 1.05 [0.69-1.61]               |
| <i>p</i>                              |                | 0.098            | <0.001           |                   | 0.034            | 0.829                         | 0.810                          |
| <b>Stroke</b>                         |                |                  |                  |                   |                  |                               |                                |
| % (n)                                 | 13.7 (327)     | 18.4 (579)       | 23.3 (209)       | 13.4 (567)        | 25.0 (547)       | -                             | -                              |
| RR [95% CI]                           | 1              | 1.34 [1.04-1.73] | 1.70 [1.30-2.22] | 1                 | 1.86 [1.55-2.24] | -                             | -                              |
| <i>p</i>                              |                | 0.027            | 0.001            |                   | <0.001           |                               |                                |
| RR <sub>adj</sub> [95% CI]            | 1              | 1.20 [0.89-1.63] | 2.03 [1.42-2.92] | 1                 | 1.42 [1.03-1.97] | 0.87 [0.60-1.25]              | 1.01 [0.67-1.53]               |
| <i>p</i>                              |                | 0.216            | <0.001           |                   | 0.035            | 0.441                         | 0.963                          |

CI = confidence interval; RR = relative risk from bivariate models; RR<sub>adj</sub> = relative risk adjusted for age, sex, ethnicity, wealth, alcohol intake, body mass index, and physical activity (for smoking status) or smoking status (for physical activity).

<sup>1</sup> Multiplicative interaction between smoking status and physical activity. Results can be interpreted as the difference in RR between high active and low active former/current smokers, relative to the difference in RR between high and low active never smokers. Thus, an interaction term above 1 indicates the disparity between high and low active groups was greater for former/current smokers than never smokers, and an interaction term below 1 indicates the disparity between high and low active groups was smaller for former/current smokers than never smokers.

Note: For each outcome, the sample is restricted to those who did not report the presence of the outcome at baseline. Results therefore indicate the prevalence and relative risk of new-onset health problems over the follow-up period.

Supplementary Table 3. (continued)

|                                                | Smoking status |                  |                   | Physical activity |                  | Interaction <sup>1</sup>      |                                |
|------------------------------------------------|----------------|------------------|-------------------|-------------------|------------------|-------------------------------|--------------------------------|
|                                                | Never smoker   | Former smoker    | Current smoker    | High active       | Low active       | Former smoker<br>x low active | Current smoker<br>x low active |
| <b>Cancer</b>                                  |                |                  |                   |                   |                  |                               |                                |
| % (n)                                          | 18.0 (430)     | 21.9 (688)       | 24.6 (221)        | 17.7 (749)        | 26.9 (589)       | -                             | -                              |
| RR [95% CI]                                    | 1              | 1.22 [1.06-1.40] | 1.36 [1.07-1.73]  | 1                 | 1.52 [1.21-1.90] | -                             | -                              |
| <i>p</i>                                       |                | 0.006            | 0.013             |                   | 0.002            |                               |                                |
| RR <sub>adj</sub> [95% CI]                     | 1              | 1.13 [0.93-1.37] | 1.57 [1.15-2.16]  | 1                 | 1.34 [0.98-1.83] | 0.96 [0.69-1.32]              | 0.95 [0.56-1.61]               |
| <i>p</i>                                       |                | 0.207            | 0.006             |                   | 0.065            | 0.792                         | 0.831                          |
| <b>Chronic lung disease</b>                    |                |                  |                   |                   |                  |                               |                                |
| % (n)                                          | 6.9 (164)      | 14.1 (443)       | 32.5 (292)        | 9.0 (382)         | 23.6 (517)       | -                             | -                              |
| RR [95% CI]                                    | 1              | 2.05 [1.56-2.72] | 4.76 [3.10-7.32]  | 1                 | 2.61 [1.79-3.81] | -                             | -                              |
| <i>p</i>                                       |                | <0.001           | <0.001            |                   | 0.001            |                               |                                |
| RR <sub>adj</sub> [95% CI]                     | 1              | 2.14 [1.42-3.24] | 6.27 [3.88-10.09] | 1                 | 2.66 [1.65-4.27] | 0.74 [0.49-1.12]              | 0.63 [0.40-0.99]               |
| <i>p</i>                                       |                | 0.001            | <0.001            |                   | <0.001           | 0.157                         | 0.044                          |
| <b>Clinically relevant depressive symptoms</b> |                |                  |                   |                   |                  |                               |                                |
| % (n)                                          | 52.8 (1259)    | 58.0 (1823)      | 62.9 (564)        | 52.4 (2219)       | 65.1 (1428)      | -                             | -                              |
| RR [95% CI]                                    | 1              | 1.10 [0.98-1.24] | 1.19 [1.02-1.39]  | 1                 | 1.24 [1.13-1.36] | -                             | -                              |
| <i>p</i>                                       |                | 0.111            | 0.029             |                   | <0.001           |                               |                                |
| RR <sub>adj</sub> [95% CI]                     | 1              | 1.10 [0.96-1.26] | 1.18 [0.98-1.43]  | 1                 | 1.07 [0.91-1.27] | 1.01 [0.84-1.22]              | 1.09 [0.82-1.43]               |
| <i>p</i>                                       |                | 0.184            | 0.087             |                   | 0.396            | 0.905                         | 0.556                          |

CI = confidence interval; RR = relative risk from bivariate models; RR<sub>adj</sub> = relative risk adjusted for age, sex, ethnicity, wealth, alcohol intake, body mass index, and physical activity (for smoking status) or smoking status (for physical activity).

<sup>1</sup> Multiplicative interaction between smoking status and physical activity. Results can be interpreted as the difference in RR between high active and low active former/current smokers, relative to the difference in RR between high and low active never smokers. Thus, an interaction term above 1 indicates the disparity between high and low active groups was greater for former/current smokers than never smokers, and an interaction term below 1 indicates the disparity between high and low active groups was smaller for former/current smokers than never smokers.

Note: For each outcome, the sample is restricted to those who did not report the presence of the outcome at baseline. Results therefore indicate the prevalence and relative risk of new-onset health problems over the follow-up period.

**Supplementary Table 4.** Main effects of smoking status and physical activity and the interaction between smoking status and physical activity for risks of incident health problems over 12-year follow-up: sample restricted to participants with data at Wave 2 and Wave 8

|                                       | Smoking status |                  |                  | Physical activity |                  | Interaction <sup>1</sup>      |                                |
|---------------------------------------|----------------|------------------|------------------|-------------------|------------------|-------------------------------|--------------------------------|
|                                       | Never smoker   | Former smoker    | Current smoker   | High active       | Low active       | Former smoker<br>x low active | Current smoker<br>x low active |
| <b>Fair/poor self-rated health</b>    |                |                  |                  |                   |                  |                               |                                |
| % (n)                                 | 31.5 (351)     | 39.0 (494)       | 45.4 (129)       | 32.9 (668)        | 47.9 (306)       | -                             | -                              |
| RR [95% CI]                           | 1              | 1.24 [1.06-1.45] | 1.44 [1.14-1.84] | 1                 | 1.45 [1.24-1.71] | -                             | -                              |
| <i>p</i>                              |                | 0.008            | 0.003            |                   | <0.001           |                               |                                |
| RR <sub>adj</sub> [95% CI]            | 1              | 1.16 [0.96-1.41] | 1.53 [1.13-2.05] | 1                 | 1.19 [0.90-1.56] | 1.06 [0.74-1.52]              | 1.11 [0.65-1.91]               |
| <i>p</i>                              |                | 0.134            | 0.005            |                   | 0.223            | 0.734                         | 0.693                          |
| <b>Limiting long-standing illness</b> |                |                  |                  |                   |                  |                               |                                |
| % (n)                                 | 47.5 (488)     | 52.6 (599)       | 50.0 (135)       | 48.2 (915)        | 57.1 (307)       | -                             | -                              |
| RR [95% CI]                           | 1              | 1.11 [0.96-1.28] | 1.05 [0.83-1.33] | 1                 | 1.18 [1.01-1.39] | -                             | -                              |
| <i>p</i>                              |                | 0.166            | 0.662            |                   | 0.040            |                               |                                |
| RR <sub>adj</sub> [95% CI]            | 1              | 1.09 [0.92-1.30] | 1.08 [0.82-1.43] | 1                 | 1.07 [0.82-1.38] | 0.98 [0.69-1.39]              | 1.18 [0.69-2.02]               |
| <i>p</i>                              |                | 0.321            | 0.572            |                   | 0.626            | 0.926                         | 0.543                          |
| <b>Coronary heart disease</b>         |                |                  |                  |                   |                  |                               |                                |
| % (n)                                 | 5.7 (73)       | 7.9 (114)        | 8.6 (32)         | 6.1 (138)         | 9.6 (81)         | -                             | -                              |
| RR [95% CI]                           | 1              | 1.39 [1.03-1.88] | 1.52 [0.99-2.35] | 1                 | 1.56 [1.17-2.07] | -                             | -                              |
| <i>p</i>                              |                | 0.033            | 0.056            |                   | 0.002            |                               |                                |
| RR <sub>adj</sub> [95% CI]            | 1              | 1.20 [0.82-1.76] | 1.72 [0.99-2.98] | 1                 | 1.12 [0.66-1.88] | 1.37 [0.72-2.63]              | 0.94 [0.38-2.35]               |
| <i>p</i>                              |                | 0.359            | 0.053            |                   | 0.677            | 0.339                         | 0.893                          |
| <b>Stroke</b>                         |                |                  |                  |                   |                  |                               |                                |
| % (n)                                 | 5.4 (72)       | 6.5 (100)        | 8.1 (32)         | 5.6 (131)         | 7.9 (73)         | -                             | -                              |
| RR [95% CI]                           | 1              | 1.21 [0.89-1.65] | 1.50 [0.98-2.31] | 1                 | 1.43 [1.06-1.92] | -                             | -                              |
| <i>p</i>                              |                | 0.234            | 0.065            |                   | 0.019            |                               |                                |
| RR <sub>adj</sub> [95% CI]            | 1              | 1.02 [0.69-1.51] | 1.42 [0.78-2.57] | 1                 | 1.07 [0.63-1.81] | 1.15 [0.58-2.27]              | 1.59 [0.64-3.92]               |
| <i>p</i>                              |                | 0.918            | 0.247            |                   | 0.812            | 0.682                         | 0.315                          |

CI = confidence interval; RR = relative risk from bivariate models; RR<sub>adj</sub> = relative risk adjusted for age, sex, ethnicity, wealth, alcohol intake, body mass index, and physical activity (for smoking status) or smoking status (for physical activity).

<sup>1</sup> Multiplicative interaction between smoking status and physical activity. Results can be interpreted as the difference in RR between high active and low active former/current smokers, relative to the difference in RR between high and low active never smokers. Thus, an interaction term above 1 indicates the disparity between high and low active groups was greater for former/current smokers than never smokers, and an interaction term below 1 indicates the disparity between high and low active groups was smaller for former/current smokers than never smokers.

Note: For each outcome, the sample is restricted to those who did not report the presence of the outcome at baseline. Results therefore indicate the prevalence and relative risk of new-onset health problems over the follow-up period.

**Supplementary Table 4.** (continued)

|                                                | Smoking status |                  |                   | Physical activity |                  | Interaction <sup>1</sup>      |                                |
|------------------------------------------------|----------------|------------------|-------------------|-------------------|------------------|-------------------------------|--------------------------------|
|                                                | Never smoker   | Former smoker    | Current smoker    | High active       | Low active       | Former smoker<br>x low active | Current smoker<br>x low active |
| <b>Cancer</b>                                  |                |                  |                   |                   |                  |                               |                                |
| % (n)                                          | 9.8 (125)      | 11.6 (173)       | 11.5 (44)         | 10.1 (228)        | 12.9 (114)       | -                             | -                              |
| RR [95% CI]                                    | 1              | 1.19 [0.93-1.51] | 1.17 [0.82-1.68]  | 1                 | 1.28 [1.01-1.62] | -                             | -                              |
| <i>p</i>                                       |                | 0.162            | 0.388             |                   | 0.044            |                               |                                |
| RR <sub>adj</sub> [95% CI]                     | 1              | 1.22 [0.91-1.64] | 1.20 [0.74-1.94]  | 1                 | 1.38 [0.93-2.06] | 0.82 [0.49-1.39]              | 1.07 [0.51-2.25]               |
| <i>p</i>                                       |                | 0.192            | 0.460             |                   | 0.111            | 0.467                         | 0.864                          |
| <b>Chronic lung disease</b>                    |                |                  |                   |                   |                  |                               |                                |
| % (n)                                          | 2.6 (34)       | 5.0 (75)         | 14.4 (52)         | 3.4 (78)          | 9.4 (83)         | -                             | -                              |
| RR [95% CI]                                    | 1              | 1.94 [1.28-2.93] | 5.54 [3.54-8.66]  | 1                 | 2.75 [2.00-3.78] | -                             | -                              |
| <i>p</i>                                       |                | 0.002            | <0.001            |                   | <0.001           |                               |                                |
| RR <sub>adj</sub> [95% CI]                     | 1              | 2.67 [1.41-5.03] | 7.02 [3.49-14.12] | 1                 | 4.09 [2.01-8.32] | 0.47 [0.20-1.09]              | 0.45 [0.18-1.13]               |
| <i>p</i>                                       |                | 0.002            | <0.001            |                   | <0.001           | 0.077                         | 0.088                          |
| <b>Clinically relevant depressive symptoms</b> |                |                  |                   |                   |                  |                               |                                |
| % (n)                                          | 43.7 (283)     | 44.7 (334)       | 48.8 (104)        | 42.9 (480)        | 49.3 (241)       | -                             | -                              |
| RR [95% CI]                                    | 1              | 1.02 [0.84-1.24] | 1.12 [0.85-1.47]  | 1                 | 1.15 [0.95-1.39] | -                             | -                              |
| <i>p</i>                                       |                | 0.832            | 0.430             |                   | 0.147            |                               |                                |
| RR <sub>adj</sub> [95% CI]                     | 1              | 1.06 [0.84-1.33] | 0.98 [0.68-1.41]  | 1                 | 1.01 [0.74-1.38] | 1.02 [0.67-1.55]              | 1.37 [0.77-2.41]               |
| <i>p</i>                                       |                | 0.639            | 0.917             |                   | 0.965            | 0.931                         | 0.284                          |

CI = confidence interval; RR = relative risk from bivariate models; RR<sub>adj</sub> = relative risk adjusted for age, sex, ethnicity, wealth, alcohol intake, body mass index, and physical activity (for smoking status) or smoking status (for physical activity).

<sup>1</sup> Multiplicative interaction between smoking status and physical activity. Results can be interpreted as the difference in RR between high active and low active former/current smokers, relative to the difference in RR between high and low active never smokers. Thus, an interaction term above 1 indicates the disparity between high and low active groups was greater for former/current smokers than never smokers, and an interaction term below 1 indicates the disparity between high and low active groups was smaller for former/current smokers than never smokers.

Note: For each outcome, the sample is restricted to those who did not report the presence of the outcome at baseline. Results therefore indicate the prevalence and relative risk of new-onset health problems over the follow-up period.

**Supplementary Table 5.** Main effects of smoking status and physical activity and the interaction between smoking status and physical activity for risks of incident health problems over 12-year follow-up: excluding current smokers with low levels of nicotine dependence (<15 cigarettes/day)

|                                       | Smoking status |                  |                  | Physical activity |                  | Interaction <sup>1</sup>      |                                |
|---------------------------------------|----------------|------------------|------------------|-------------------|------------------|-------------------------------|--------------------------------|
|                                       | Never smoker   | Former smoker    | Current smoker   | High active       | Low active       | Former smoker<br>x low active | Current smoker<br>x low active |
| <b>Fair/poor self-rated health</b>    |                |                  |                  |                   |                  |                               |                                |
| % (n)                                 | 40.9 (529)     | 49.0 (744)       | 63.8 (134)       | 42.2 (946)        | 59.3 (461)       | -                             | -                              |
| RR [95% CI]                           | 1              | 1.20 [1.05-1.37] | 1.56 [1.23-1.98] | 1                 | 1.41 [1.22-1.61] | -                             | -                              |
| <i>p</i>                              |                | 0.008            | <0.001           |                   | <0.001           |                               |                                |
| RR <sub>adj</sub> [95% CI]            | 1              | 1.14 [0.97-1.35] | 1.75 [1.29-2.36] | 1                 | 1.19 [0.94-1.49] | 0.99 [0.74-1.34]              | 0.99 [0.58-1.67]               |
| <i>p</i>                              |                | 0.115            | <0.001           |                   | 0.144            | 0.953                         | 0.955                          |
| <b>Limiting long-standing illness</b> |                |                  |                  |                   |                  |                               |                                |
| % (n)                                 | 57.1 (720)     | 62.7 (905)       | 70.8 (148)       | 58.2 (1282)       | 69.2 (491)       | -                             | -                              |
| RR [95% CI]                           | 1              | 1.10 [0.97-1.24] | 1.24 [0.99-1.56] | 1                 | 1.19 [1.04-1.36] | -                             | -                              |
| <i>p</i>                              |                | 0.143            | 0.067            |                   | 0.012            |                               |                                |
| RR <sub>adj</sub> [95% CI]            | 1              | 1.07 [0.93-1.24] | 1.36 [1.03-1.79] | 1                 | 1.07 [0.86-1.32] | 0.97 [0.73-1.29]              | 0.97 [0.58-1.63]               |
| <i>p</i>                              |                | 0.348            | 0.032            |                   | 0.548            | 0.847                         | 0.908                          |
| <b>Coronary heart disease</b>         |                |                  |                  |                   |                  |                               |                                |
| % (n)                                 | 8.8 (117)      | 11.7 (176)       | 14.9 (34)        | 9.0 (200)         | 14.9 (127)       | -                             | -                              |
| RR [95% CI]                           | 1              | 1.33 [1.04-1.70] | 1.70 [1.13-2.55] | 1                 | 1.65 [1.30-2.09] | -                             | -                              |
| <i>p</i>                              |                | 0.023            | 0.011            |                   | <0.001           |                               |                                |
| RR <sub>adj</sub> [95% CI]            | 1              | 1.13 [0.82-1.55] | 1.94 [1.10-3.41] | 1                 | 1.20 [0.79-1.83] | 1.19 [0.70-2.02]              | 1.15 [0.49-2.69]               |
| <i>p</i>                              |                | 0.459            | 0.021            |                   | 0.392            | 0.533                         | 0.750                          |
| <b>Stroke</b>                         |                |                  |                  |                   |                  |                               |                                |
| % (n)                                 | 8.2 (113)      | 9.9 (159)        | 12.6 (30)        | 7.9 (182)         | 13.1 (120)       | -                             | -                              |
| RR [95% CI]                           | 1              | 1.22 [0.95-1.56] | 1.53 [1.00-2.35] | 1                 | 1.65 [1.29-2.10] | -                             | -                              |
| <i>p</i>                              |                | 0.129            | 0.049            |                   | <0.001           |                               |                                |
| RR <sub>adj</sub> [95% CI]            | 1              | 1.12 [0.80-1.57] | 1.69 [0.87-3.26] | 1                 | 1.41 [0.93-2.13] | 0.81 [0.47-1.39]              | 1.59 [0.65-3.89]               |
| <i>p</i>                              |                | 0.498            | 0.121            |                   | 0.109            | 0.437                         | 0.306                          |

CI = confidence interval; RR = relative risk from bivariate models; RR<sub>adj</sub> = relative risk adjusted for age, sex, ethnicity, wealth, alcohol intake, body mass index, and physical activity (for smoking status) or smoking status (for physical activity).

<sup>1</sup> Multiplicative interaction between smoking status and physical activity. Results can be interpreted as the difference in RR between high active and low active former/current smokers, relative to the difference in RR between high and low active never smokers. Thus, an interaction term above 1 indicates the disparity between high and low active groups was greater for former/current smokers than never smokers, and an interaction term below 1 indicates the disparity between high and low active groups was smaller for former/current smokers than never smokers.

Note: For each outcome, the sample is restricted to those who did not report the presence of the outcome at baseline. Results therefore indicate the prevalence and relative risk of new-onset health problems over the follow-up period.

Supplementary Table 5. (continued)

|                                                | Smoking status |                  |                    | Physical activity |                  | Interaction <sup>1</sup>      |                                |
|------------------------------------------------|----------------|------------------|--------------------|-------------------|------------------|-------------------------------|--------------------------------|
|                                                | Never smoker   | Former smoker    | Current smoker     | High active       | Low active       | Former smoker<br>x low active | Current smoker<br>x low active |
| <b>Cancer</b>                                  |                |                  |                    |                   |                  |                               |                                |
| % (n)                                          | 13.4 (178)     | 15.8 (247)       | 19.8 (48)          | 13.8 (309)        | 18.4 (164)       | -                             | -                              |
| RR [95% CI]                                    | 1              | 1.18 [0.96-1.45] | 1.48 [1.05-2.10]   | 1                 | 1.33 [1.08-1.63] | -                             | -                              |
| <i>p</i>                                       |                | 0.112            | 0.027              |                   | 0.006            |                               |                                |
| RR <sub>adj</sub> [95% CI]                     | 1              | 1.11 [0.85-1.43] | 1.85 [1.18-2.91]   | 1                 | 1.29 [0.91-1.82] | 1.01 [0.65-1.57]              | 0.81 [0.39-1.67]               |
| <i>p</i>                                       |                | 0.446            | 0.008              |                   | 0.149            | 0.974                         | 0.565                          |
| <b>Chronic lung disease</b>                    |                |                  |                    |                   |                  |                               |                                |
| % (n)                                          | 3.3 (44)       | 7.8 (120)        | 26.3 (61)          | 5.0 (111)         | 13.0 (114)       | -                             | -                              |
| RR [95% CI]                                    | 1              | 2.34 [1.65-3.34] | 7.89 [5.22-11.91]  | 1                 | 2.60 [1.98-3.41] | -                             | -                              |
| <i>p</i>                                       |                | <0.001           | <0.001             |                   | <0.001           |                               |                                |
| RR <sub>adj</sub> [95% CI]                     | 1              | 2.80 [1.64-4.79] | 11.40 [6.10-21.31] | 1                 | 3.49 [1.87-6.50] | 0.57 [0.27-1.17]              | 0.40 [0.17-0.93]               |
| <i>p</i>                                       |                | <0.001           | <0.001             |                   | <0.001           | 0.123                         | 0.033                          |
| <b>Clinically relevant depressive symptoms</b> |                |                  |                    |                   |                  |                               |                                |
| % (n)                                          | 53.5 (418)     | 56.4 (535)       | 63.0 (104)         | 52.4 (668)        | 62.5 (389)       | -                             | -                              |
| RR [95% CI]                                    | 1              | 1.06 [0.90-1.24] | 1.18 [0.90-1.55]   | 1                 | 1.19 [1.02-1.40] | -                             | -                              |
| <i>p</i>                                       |                | 0.512            | 0.236              |                   | 0.028            |                               |                                |
| RR <sub>adj</sub> [95% CI]                     | 1              | 1.10 [0.90-1.34] | 1.18 [0.82-1.70]   | 1                 | 1.09 [0.84-1.41] | 0.95 [0.68-1.34]              | 1.11 [0.64-1.95]               |
| <i>p</i>                                       |                | 0.370            | 0.375              |                   | 0.527            | 0.783                         | 0.705                          |

CI = confidence interval; RR = relative risk from bivariate models; RR<sub>adj</sub> = relative risk adjusted for age, sex, ethnicity, wealth, alcohol intake, body mass index, and physical activity (for smoking status) or smoking status (for physical activity).

<sup>1</sup> Multiplicative interaction between smoking status and physical activity. Results can be interpreted as the difference in RR between high active and low active former/current smokers, relative to the difference in RR between high and low active never smokers. Thus, an interaction term above 1 indicates the disparity between high and low active groups was greater for former/current smokers than never smokers, and an interaction term below 1 indicates the disparity between high and low active groups was smaller for former/current smokers than never smokers.

Note: For each outcome, the sample is restricted to those who did not report the presence of the outcome at baseline. Results therefore indicate the prevalence and relative risk of new-onset health problems over the follow-up period.
