# Supplementary material for: Combined health risks of cigarette smoking and low levels of physical activity: a prospective cohort study in England with 12-year follow-up
Source: PubMed Central journal article supplement (PMC6887020; doi:10.1136/bmjopen-2019-032852), 2019-11-27
Supplement: bmjopen-2019-032852supp003.pdf [file bmjopen-2019-032852supp003.pdf]

a

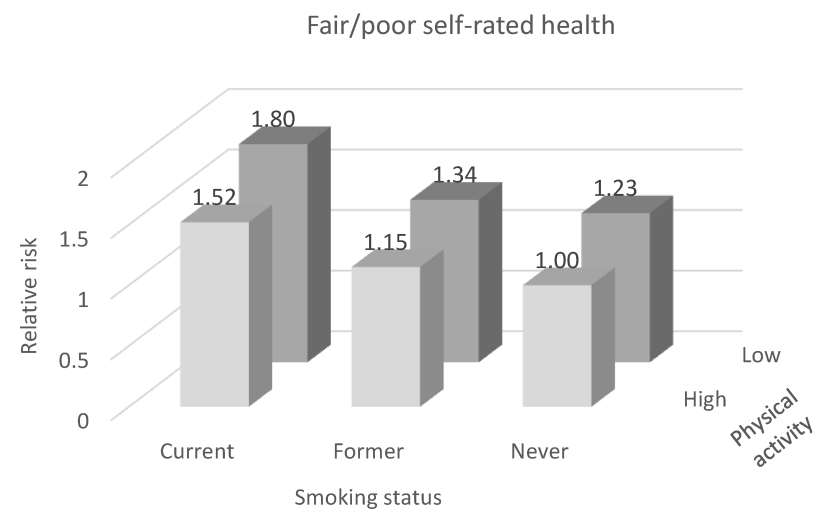

b

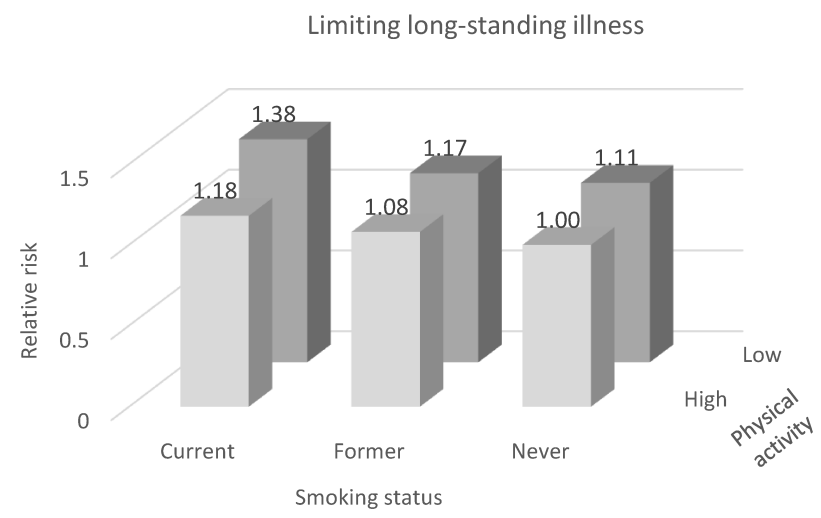

c

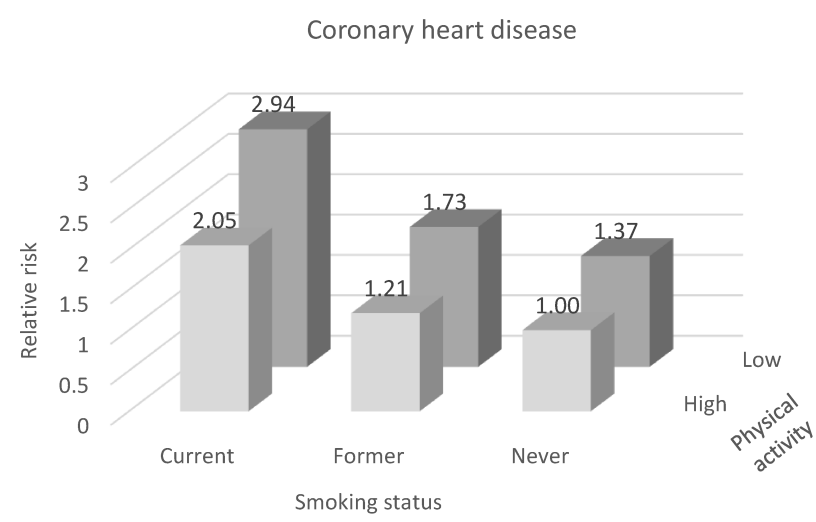

d

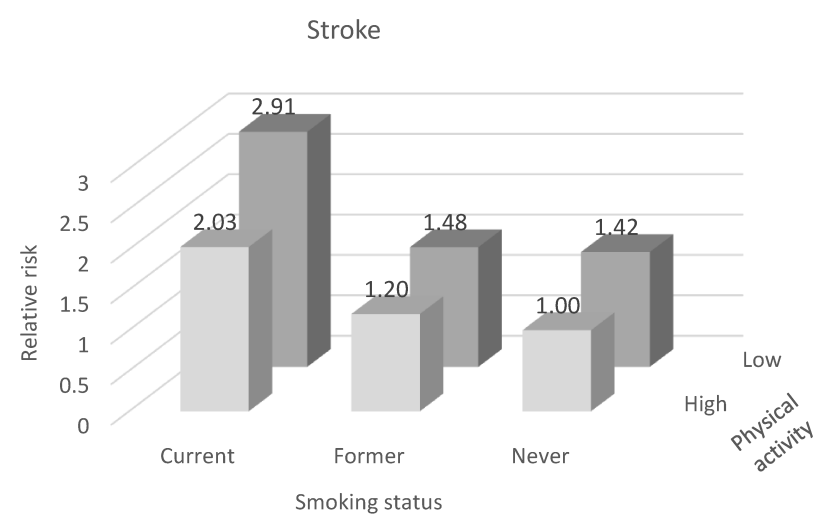

e

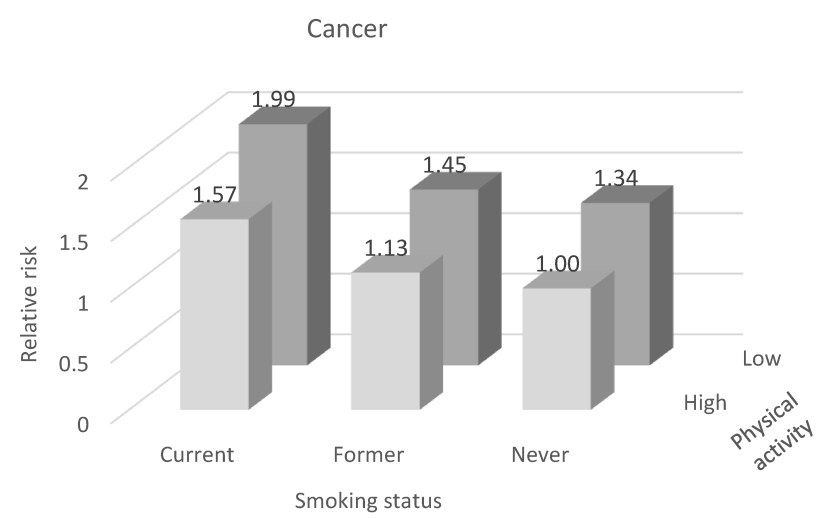

f

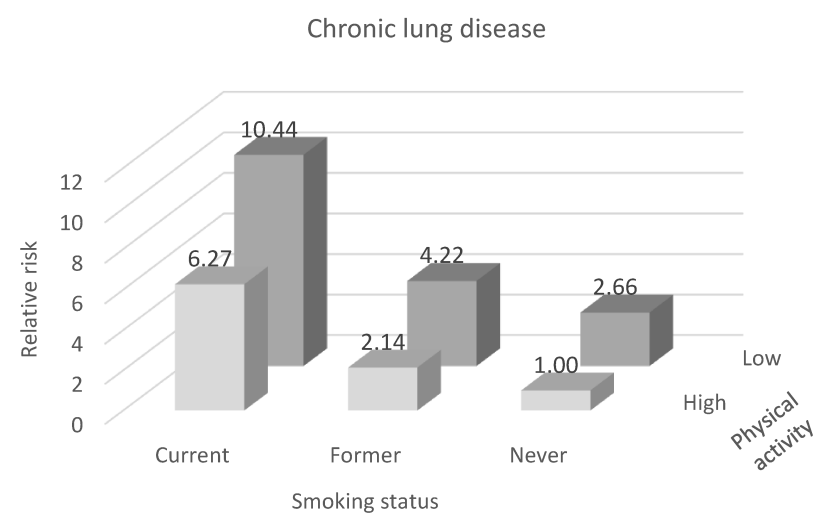

g

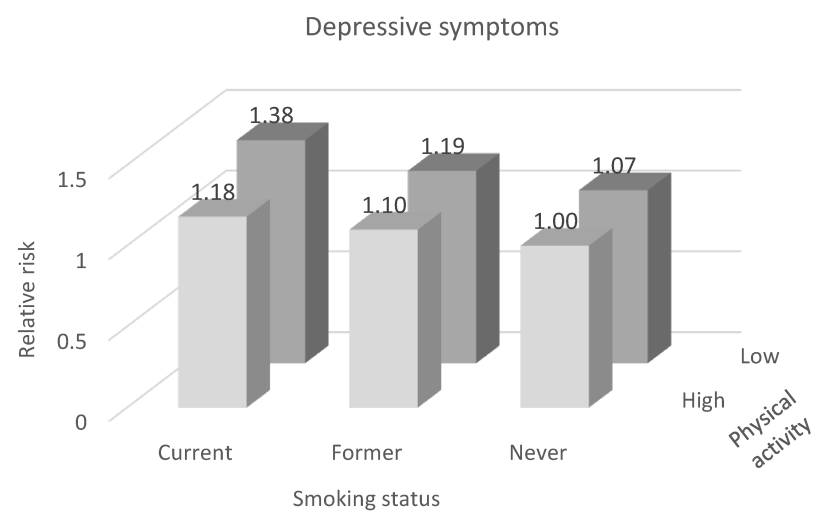

**Supplementary Figure 1.** Relative risks of developing (a) fair/poor self-rated health, (b) limiting long-standing illness, (c) coronary heart disease, (d) stroke, (e) cancer, (f) chronic lung disease, and (g) clinically relevant depressive symptoms over 12-year follow-up by baseline smoking/physical activity status, among older adults free of these conditions at baseline: imputed outcome data for participants who dropped out before Wave 8
